JEB Classics is an occasional column, featuring historic publications from *The Journal of Experimental Biology*. These articles, written by modern experts in the field, discuss each classic paper's impact on the field of biology and their own work. A PDF of the original paper is available from the JEB Archive (<http://jeb.biologists.org/>).

# JEB CLASSICS

## CIRCADIAN WINDOW OF OPPORTUNITY: WHAT HAVE WE LEARNED FROM INSECTS?

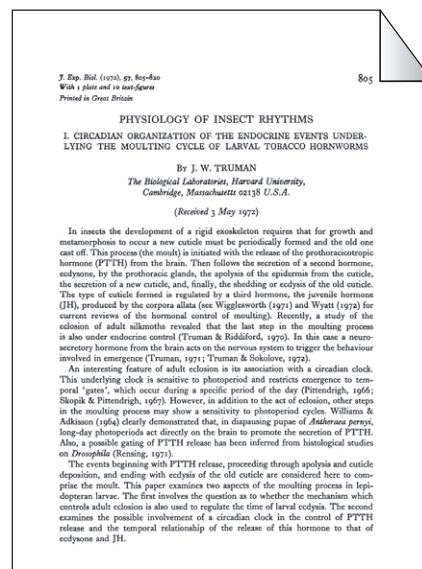

Jadwiga Giebultowicz discusses James Truman's 1972 paper entitled: 'Physiology of Insect Rhythms: I. Circadian Organization of the Endocrine Events Underlying the Moulting Cycle of Larval Tobacco Hornworms'.

A copy of the paper can be obtained from <http://jeb.biologists.org/cgi/content/abstract/57/3/805>

Diurnal rhythms in plants and animals have been observed for centuries, but their endogenous and circadian nature were not acknowledged until the 1960s (Menaker, 1969). Research during that decade provided ample evidence for an internal 'clock' generating daily rhythms in behavior through biochemistry; however, the nature and anatomical location of this clock were a mystery. Insects helped to unveil this paradox, providing critical early insights into both the genetic and the physiological bases of the clock. The discovery of the first circadian clock gene *period* in *Drosophila melanogaster* was a milestone for chronogenetics (Konopka and Benzer, 1971). The overt behavior used to identify arrhythmic *period* mutants in flies was the rhythm of emergence of the adult from its pupal cuticle. This event, termed eclosion, is 'gated' by the circadian clock, which means that it can only occur in a restricted portion of a day/night cycle. This daily window of time is species specific; for example, *D. melanogaster* adults eclose in the early morning. Then, as now, *D. melanogaster* was an excellent organism to probe the genetic nature of the clock, but too tiny to explore the clock's physiological and anatomical nature with the resources

available at the time. This quandary was approached by young James Truman working at Harvard with Lynn Riddiford. Using two species of silk moths which eclose at different times of day, they showed that eclosion gating is governed by the brain. By exchanging brains between the two species they 'transplanted' the timing of eclosion. These experiments provided compelling evidence that the moth brain contains a photoreceptor mechanism, a clock and a neuroendocrine output that are necessary and sufficient for the synchronization of eclosion behavior with the environmental photoperiod (Truman and Riddiford, 1970).

Once it was clear that eclosion into the adult is controlled by the circadian clock, Truman asked whether the same holds true for larval ecdyses. He reported his findings in his 1972 paper in *The Journal of Experimental Biology* on the circadian organization of the endocrine events underlying the larval moulting cycle (Truman, 1972). From today's perspective, several features make this paper a classic, such as the use of the tobacco hornworm, *Manduca sexta*, which has subsequently become a favorite model for insect physiology research. Further, Truman showed in this study that larval ecdyses in *Manduca* occur at a specific time of day and then investigated how this rhythm may be controlled. The highlight of this paper was the determination that release of a major insect developmental neurohormone is gated by the circadian clock.

The insect moulting cycle starts with the release of the prothoracicotropic hormone (PTTH), which stimulates the production of ecdysone by the prothoracic glands. Ecdysone initiates secretion of a new cuticle and digestion of the old one, followed by the eclosion behavior. In the JEB classic Truman showed that in contrast to adult eclosion, the synchrony of larval eclosion does not arise from circadian gating of the eclosion behavior itself. Simple but elegant experiments involving blood-tight ligations separating the brain from the rest of the body suggested that synchronous larval eclosion is the result of gated PTTH release. These data highlight the fact that circadian clocks can control separate neuroendocrine targets to synchronize larval or adult eclosion in the same species. Circadian rhythm-gated PTTH release initiates a linear sequence of events that are eventually manifested as rhythmic larval eclosion, which occurs 1–2 days after PTTH release. In contrast, the moulting cycle that produces an adult moth takes a couple of weeks as new internal organs and the radically different adult cuticle are made during metamorphosis. An endocrine signal

synchronizes the onset of ecdysis after these protracted processes have been completed so that ecdysis occurs in a narrow window of time. Truman and his co-workers later showed that the resynchronization of the eclosion behavior involves rhythmic release of the neuropeptide termed the eclosion hormone. Several laboratories built on Truman's foundational studies of neurohormonal regulation of ecdysis, and many more neuropeptides have been identified that play a role in synchronizing behavioral and physiological steps in the insect ecdysis cycle (Zitnan et al., 2007).

The initial discovery by Truman that the release of PTTH is gated by the circadian clock has been confirmed even in distantly related insect species. The best understood example involves the kissing bug, *Rhodnius prolixus* (a favorite 'model organism' of one of the JEB's first Editors, Sir V. B. Wigglesworth). In *Rhodnius*, PTTH is released daily in a gated fashion, and this rhythm is controlled by paired photosensitive clocks in the brain. Rhythmic PTTH release generates rhythmic synthesis and release of ecdysone from cells, which also possess clock properties (Steel and Vafopoulou, 2006). Rhythmic changes in ecdysone levels were recently demonstrated in the testis of adult moth (Polanska et al., 2009) leaving one to wonder about the significance of the parallel occurrence of steroidogenesis in testicular tissues in both insects and vertebrates.

Another surprising rhythm was detected in the levels of the juvenile hormone (Zhao and Zera, 2004). This hormone promotes the juvenile status of larva, and also acts as a gonadotropin in adult females. Juvenile hormone exhibits a large-amplitude daily

cycle in the hemolymph of the cricket (Zhao and Zera, 2004). Truman is no doubt pleased to read about these recent developments. It is likely that clock-controlled hormonal rhythms are widespread in insects; however, additional supporting evidence may be slow to come as sample collection requires the sacrifice of a night's sleep!

In 1972, I was an undergraduate studying Insect Physiology at the University of Warsaw in Poland and learning English by reading Truman's papers, because I was fascinated by his discoveries and wanted to understand the figure captions. I was lucky to join his lab several years later and to observe first-hand his recipe for scientific pursuit: a mix of curiosity with a drive to address big biological questions using those miniature marvels of nature, insects. Over the years, the fertile research environment created by Jim Truman has produced a large cohort of scientists who continue to use their mentor's recipe to cook up a smorgasbord of scientific discoveries.

The concept of circadian gating that Truman helped to develop in his JEB classic and other papers, provided a useful framework which helped to move chronobiology from the black box era to the functional genomics era. We now know that rhythmic expression of genes can provide a switch or rate-limiting step that restricts a given process to a specific window of time. For example, mitosis in many mammalian tissues is associated with a specific time of day, and it has been demonstrated that the circadian clock controls the expression of cell cycle-related genes that in turn modulate the expression of a key regulator of mitosis (Matsuo et al., 2003). Thus, the specific window of time during which cells are permitted to enter

mitosis is defined by the expression of genes that are necessary to initiate this process. Reflecting on the development of chronobiology since 1972, one can appreciate the immense progress that the field has made in defining the molecular basis of the clock and its outputs. Nevertheless, many important questions remain and, along with Jim Truman, I strongly believe that insects, those tiny scientific workhorses, will continue to play a central role in addressing these questions.

10.1242/jeb.034199

**Jadwiga Giebultowicz**  
Oregon State University  
giebultj@science.oregonstate.edu

## References

- Konopka, R. J. and Benzer, S. (1971). Clock mutants of *Drosophila melanogaster*. *Proc. Natl. Acad. Sci. USA* **68**, 2112-2116.
- Matsuo, T., Yamaguchi, S., Mitsui, S., Emi, A., Shimoda, F. and Okamura, H. (2003). Control mechanism of the circadian clock for timing of cell division *in vivo*. *Science* **302**, 255-259.
- Menaker, M. (1969). Biological clocks. *Bioscience* **19**, 681-693.
- Polanska, M. A., Maksimiuk-Ramirez, E., Ciuk, M. A., Kotwica, J. and Bebas, P. (2009). Clock-controlled rhythm of ecdysteroid levels in the haemolymph and testes, and its relation to sperm release in the Egyptian cotton leafworm, *Spodoptera littoralis*. *J. Insect Physiol.* **55**, 426-434.
- Steel, C. G. and Vafopoulou, X. (2006). Circadian orchestration of developmental hormones in the insect, *Rhodnius prolixus*. *Comp. Biochem. Physiol. A Mol. Integr. Physiol.* **144**, 351-364.
- Truman, J. T. (1972). Physiology of insect rhythms: I. Circadian organization of the endocrine events underlying the moulting cycle of larval tobacco hornworms. *J. Exp. Biol.* **57**, 805-820.
- Truman, J. W. and Riddiford, L. M. (1970). Neuroendocrine control of ecdysis in silkworms. *Science* **167**, 1624-1626.
- Zhao, Z. and Zera, A. J. (2004). The hemolymph JH titer exhibits a large-amplitude, morph-dependent, diurnal cycle in the wing-polymorphic cricket, *Gryllus firmus*. *J. Insect Physiol.* **50**, 93-102.
- Zitnan, D., Kim, Y. J., Zitnanova, I., Roller, L. and Adams, M. E. (2007). Complex steroid-peptide-receptor cascade controls insect ecdysis. *Gen. Comp. Endocrinol.* **153**, 88-96.
